# Supplementary material
Source: PubMed Central journal article supplement (PMC3498952)
Supplement: NIHMS409621-supplement-6.pdf [file NIHMS409621-supplement-6.pdf]

**From:** Ellen Finnie Duranceau <efinnie@MIT.EDU>  
**Subject:** RE: [Oapolicyoptout] Waiver for Nature publication--CONFIRMATION OF WAIVER  
**Date:** January 11, 2012 8:56:14 AM EST  
**To:** Johannes Graeff <jgraeff@mit.edu>  
**Cc:** Shawn Hennessey <shawn\_h@mit.edu>, Li-Huei Tsai <lhtsai@mit.edu>

---

Hello Professor Tsai and Dr. Graeff:

Thank you for this notice, accepted on behalf of Ann Wolpert, the Provost's designate for waivers of the MIT Faculty Open Access Policy.

As noted in the policy: "The Provost or Provost's designate will waive application of the policy for a particular article upon written notification by the author, who informs MIT of the reason."

The policy is therefore waived for this article by receipt of your message below.

Thank you, and best wishes for your publication,

Ellen Duranceau

---

Ellen Finnie Duranceau  
Program Manager, Scholarly Publishing and Licensing  
MIT Libraries  
P 617 253 8483  
[efinnie@mit.edu](mailto:efinnie@mit.edu)  
<http://libraries.mit.edu/scholarly>

---

**From:** oapolicyoptout-bounces@MIT.EDU [mailto:oapolicyoptout-bounces@MIT.EDU] **On Behalf Of** Johannes Graeff  
**Sent:** Tuesday, January 10, 2012 8:07 PM  
**To:** oapolicyoptout@mit.edu  
**Cc:** Shawn Hennessey  
**Subject:** [Oapolicyoptout] Waiver for Nature publication

Hi,

please see below. Could you provide us with a waiver for the final submission of our accepted manuscript to Nature?

I am the first author of the paper, and my PI is Dr. Li-Huei Tsai, at the Picower Institute for Learning and Memory, BCS.

The title of our paper is **An epigenetic blockade of cognitive functions in the neurodegenerating brain.**

Thanks.

Best regards,

Johannes Gräff

---

Johannes Gräff, PhD  
The Picower Institute for Learning and Memory  
Massachusetts Institute of Technology  
Building 46 Room 4214  
77 Massachusetts Avenue  
Cambridge, MA 02139  
USA

Phone: +1 617 324 1645  
Mobile: +1 617 784 0579  
Email: [jgraeff@mit.edu](mailto:jgraeff@mit.edu)

Dear Dr Graeff

Thank you for your email, I have pasted below some information regarding how to obtain the waiver, I hope that this helps:

If any authors on the paper are subject to these policies we need you to provide us with an exemption/waiver from the Office of the Dean (Harvard) or the Provost (MIT) for every affected author on the manuscript. If no authors are from MIT and none are voting members of Harvard FAS then you are not subject to the policy and no waiver is required.

The MIT/Harvard Open Access policy retains a non-exclusive, non-commercial licence for MIT/Harvard, and is incompatible with the subscription business model, which is the only proven mechanism of supporting high-impact, high-circulation journals with a thorough peer-review process and high rejection rates.

NPG already allows authors of original research papers to retain copyright in their work. We do require an exclusive licence to publish, but authors can:

- post a preprint (eg in arXiv or Nature Precedings)
- reuse the article in future printed volumes
- use the article for teaching
- archive the accepted version in a repository of your choice for release six months after publication (in compliance with your funding body's access policy).

We believe this provides authors with the rights they need to ensure the highest possible impact of their work, and allows some versions of articles to be freely available at all times. Importantly, it also ensures that the definitive version, for the sake of the scientific record, remains on [nature.com](http://nature.com), along with any relevant erratum or addendum.

As the corresponding author we ask that you take responsibility for collecting and collating the necessary waivers from every MIT author and each voting member of Harvard FAS on your paper.

Harvard FAS authors can obtain a waiver by following the link below and supplying the requested information:

<http://osc.hul.harvard.edu/authors/waiver/generate>

- \* An epigenetic blockade of cognitive functions in the neurodegenerating brain
- \* Author names
- \* Nature
- \* Nature Publishing Group
- \* The Harvard Open Access policy retains a non-exclusive, non-commercial licence for Harvard, and is incompatible with the

subscription business model of Nature Publishing Group. Without a waiver to the Open Access policy, Nature will be unable to publish the paper.

MIT authors can obtain a waiver by sending an email or other written notice to [oapolicyoptout@mit.edu](mailto:oapolicyoptout@mit.edu) informing MIT of the following:

- \* Name of MIT author
- \* An epigenetic blockade of cognitive functions in the neurodegenerating brain
- \* Nature
- \* The MIT Open Access policy retains a non-exclusive, non-commercial licence for MIT, and is incompatible with the subscription business model of Nature Publishing Group. Without a waiver to the Open Access policy, Nature will be unable to publish the paper.

Kind Regards

Claire Smith [c.smith@nature.com](mailto:c.smith@nature.com)  
Editorial Assistant

**nature**

The Macmillan Building  
4 Crinan Street  
London  
N1 9XW

---

**From:** Johannes Graeff [<mailto:jgraeff@MIT.EDU>]  
**Sent:** 09 January 2012 23:28  
**To:** Smith, Claire  
**Cc:** Li-Huei Tsai  
**Subject:** Re: 2011-07-09550A

Dear Mrs Smith,

I am contacting you today on behalf of Dr. Tsai with respect to our recently accepted manuscript 2011-07-09550A.

I just went through the editorial checklist for Biology Letters. It states there

Harvard and MIT authors: signed waiver letter accepting our licence to publish terms and conditions is provided

What exactly do you require to be written in such a letter?

Thank you very much.

Best regards,

Johannes Gräff

---

Johannes Gräff, PhD  
The Picower Institute for Learning and Memory  
Massachusetts Institute of Technology  
Building 46 Room 4214  
77 Massachusetts Avenue  
Cambridge, MA 02139  
USA

Phone: +1 617 324 1645  
Mobile: +1 617 784 0579  
Email: [jgraeff@mit.edu](mailto:jgraeff@mit.edu)
